# Supplementary material for: Critical effect of nanometer-size surface roughness of a porous Si seed layer on the defect density of epitaxial Si films for solar cells by rapid vapor deposition
Source: Royal Society of Chemistry journal article supplement (doi:10.1039/c7ce02162c), 2018-01-01
Supplement: c7ce02162c1.pdf [file c7ce02162c1.pdf]

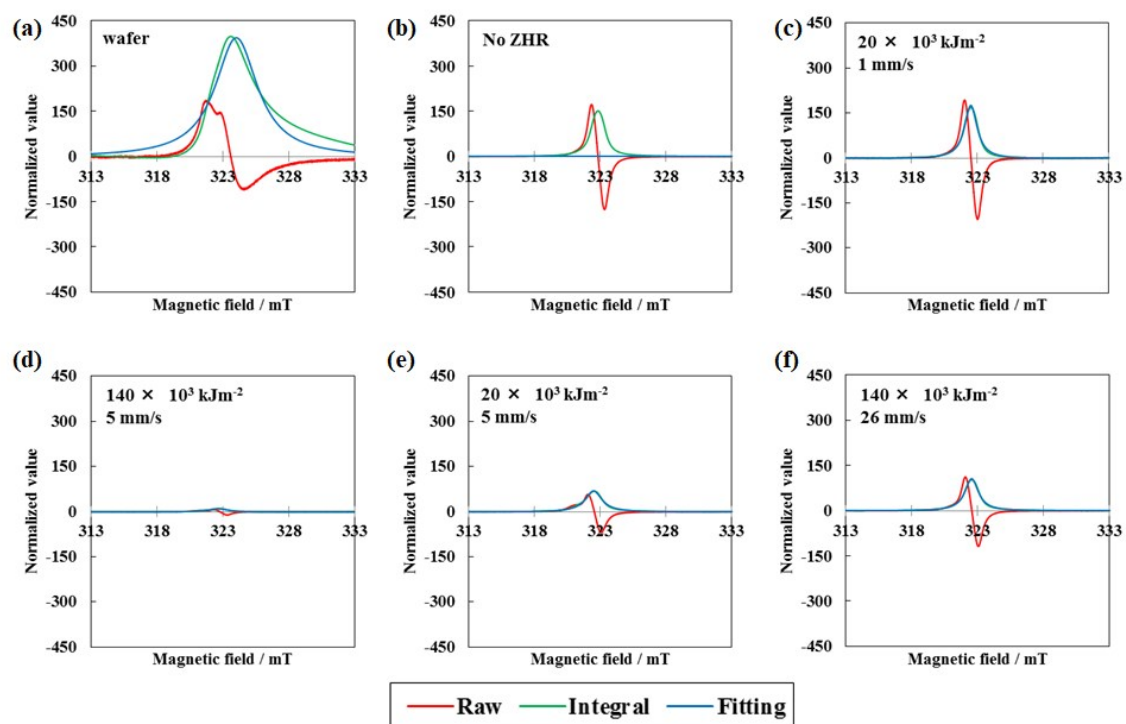

Figure S1 ESR spectra of n-doped Si wafer (a), epitaxial Si films fabricated via RVD with P-doped Si source on DLPS before (b) and after ZHR at different HB and scan rates (c-f).

Table SI Spin densities of epitaxial Si films fabricated via RVD with P-doped Si source on DLPS with and without ZHR measured using ESR.

|         | No ZHR | $20 \times 10^3 \text{ kJ/m}^2$ | $140 \times 10^3 \text{ kJ/m}^2$ |
|---------|--------|---------------------------------|----------------------------------|
| -       | 7.81   | -                               | -                                |
| 1 mm/s  | -      | 8.65                            | -                                |
| 5 mm/s  | -      | 8.25                            | 2.91                             |
| 26 mm/s | -      | -                               | 7.11                             |
| wafer   | 85.8   | -                               | -                                |

\* 単位 :  $\times 10^{17} \text{ spin/cm}^3$
